# Supplementary material
Source: Research Square preprint supplement (doi:10.21203/rs.3.rs-9721145/v1)
Supplement: Supplementary file 1 [file 6da6016f39edd89492fe9524.docx]

Supplementary materials

Figure S1. Scatter plots of PLSR-predicted versus measured values for C and N (n = 57) predicted independently.

Figure S2. Soil depth effect on soil C: N ratio under varying planting densities of *P. reticulatum* within the soil profile. Horizontal bars show the standard error of the means.

Figure S3. Corrected peak areas (cm-1) representing the amount of a) clay and b) quartz analyzed with DRIFTS.

Table S1. Type I Analysis of Variance Table with Kenward-Roger's method

| Fixed Effects | Sum sq | Mean sq | NumDF | DenDF | Fvalue | Pr(>F) |
| --- | --- | --- | --- | --- | --- | --- |
| PD | 0.0795 | 0.0397 | 2 | 2 | 2.0564 | 0.3272 |
| Depth | 0.1363 | 0.0340 | 4 | 16 | 1.7627 | 0.1858 |
