# Supplementary material
Source: Research Square preprint supplement (doi:10.21203/rs.3.rs-9721145/v1)
Supplement: Supplementary file 2 [file 9d72ef9b3f8bd95c341f733f.docx]

# Appendix

# 1.0 Results

## 1.1 DRIFTS analysis and estimation of soil C and N content using PLSR

The PLSR calibrated models using DRIFTS spectra of the sample (n = 134) showed acceptable results for soil C (RPD = 5.02; R2 = 0.96) and for soil N (RPD = 2.84; R2 = 0.88) (Table A1). The scatter plots of the measured and predicted C and N values, based on the prediction models, are shown in Fig. S1.

Table A1. Calibration results using 134 DRIFTS spectra of bulk soils on an independent validation approach.

| Property | Factora | Preprocessing method | Wavenumbers (cm-1) | Model accuracy parametersb | | |
| --- | --- | --- | --- | --- | --- | --- |
|  |  |  |  | R2 | RPD | RMSEP |
| C | 10 | Second derivative | 3997-2638, 1959-599 | 0.88 | 5.02 | 0.328 |
| N | 6 | First derivative + MSC | 3997 -3656, 3318 – 1618, 941 - 599 | 0.96 | 2.84 | 0.0621 |

C (carbon), N (nitrogen), MSC (multiplicative scattering correction), R2 (coefficient of determination), RPD (residual prediction deviation), RMSEP (root mean square error of prediction).

aThe optimum number of PLS factors used in model calibration; bCalculated for model calibration.

## 1.2 Correlation analyses: DRIFT peaks, soil C, N, C: N ratio, pH, AvailP, depth layer

The Spearman correlation coefficients (r) between the relative peak areas in DRIFTS (1612, 1525, and 1158 cm-1) and various measured soil parameters are presented in Table A2. The peak area at 1525 cm-1 demonstrated the strongest and most consistent positive correlations with soil properties, particularly C (r = 0.65, P < 0.0001), N (r = 0.69, P < 0.0001), and available phosphorus (AvailP) (r = 0.75, P < 0.0001). Conversely, the peak area at 1158 cm-1 exhibited strong negative correlations with these same parameters (C: r = -0.69, P < 0.0001; N: r = –0.68, P < 0.0001; AvailP: r = -0.75, P < 0.0001). The peak area at 1612 cm-1 was moderately positively correlated with C (r = 0.49, P < 0.0001), N (r = 0.39, P < 0.0001), and AvailP (r = 0.29, P < 0.05). However, it also showed a significant negative correlation with bulk density (r = -0.40, P < 0.0001). Additionally, the C: N ratio was significantly negatively correlated with the 1525 cm-1 peak (r = -0.40, P < 0.0001) and positively correlated with the 1158 cm-1 peak (r = 0.32, P < 0.01). Soil depth was negatively correlated with 1612 cm-1 (r = 0.31, P < 0.01) and 1525 cm-1 (r = 0.89, P < 0.0001), while showing positive correlation with 1158cm-1 (r = 0.31, P < 0.0001).

Table A2. Spearman correlation coefficients between DRIFTS relative peak areas of bulk soil and soil parameters.

|  | Correlation coefficient (*r*) by peak | | |
| --- | --- | --- | --- |
|  | 1612 cm-1 | 1525 cm-1 | 1158cm-1 |
| C | 0.49*** | 0.65*** | -0.69*** |
| N | 0.39*** | 0.69*** | -0.68*** |
| C: N | 0.03 | -0.40*** | 0.32** |
| Bulk density | -0.40*** | 0.16 | -0.04 |
| Cstock | 0.20 | -0.01 | -0.04 |
| pH | -0.12 | -0.13 | 0.21 |
| AvailP | 0.29* | 0.75*** | -0.75*** |
| Depth | -0.31** | -0.85*** | 0.85*** |

Significance levels: ***P < 0.0001, **P < 0.01, *P < 0.05
